# Supplementary material
Source: PubMed Central journal article supplement (PMC6433274)
Supplement: NIHMS82280-supplement-Appendix.pdf [file NIHMS82280-supplement-Appendix.pdf]

## **SUPPLEMENTARY MATERIALS**

Supplementary Material 1: General search terms

Supplementary Table 1: Database searches

Supplementary Material 2: Critical Appraisal Tool

Supplementary Table 2: Quality appraisal of studies reporting severe mental disorders or substance use disorders in prison populations of low- and middle-income countries

Supplementary Table 3: Meta-regression analysis of study characteristics relating to severe mental illnesses

Supplementary Table 4: Sensitivity analysis for severe mental illnesses

Supplementary Table 5: Meta-regression analysis of study characteristics relating to substance use disorders

Supplementary Figure 1: Funnel Plots estimating small sample bias in studies reporting severe mental illnesses and substance use disorders in prison samples in low- and middle-income countries

## Supplementary Material 1: General search terms

### 1. Prison condition:

prison\* OR imprison\* OR sentence\* OR remand\* OR jail\* OR correctional OR “criminal justice”

### 2. Epidemiological studies:

Epidemiology (Subject Heading) OR prevalence OR incidence

### 3. Mental health outcome:

Mental Disorders (Subject Heading) OR Substance-Related Disorders (Subject Heading) OR psychiatr\* OR psycho\* OR depress\* OR bipolar OR schizophren\* OR alcohol\* OR substance OR addict\*

### Limit:

1987 to Present

## Supplementary Table 1: Database searches

| Prison                                                                                                                                                                                                                                                                                                                                     | Epidemiology                                                     | Mental health                                                                                                                                                                                                   |
|--------------------------------------------------------------------------------------------------------------------------------------------------------------------------------------------------------------------------------------------------------------------------------------------------------------------------------------------|------------------------------------------------------------------|-----------------------------------------------------------------------------------------------------------------------------------------------------------------------------------------------------------------|
| Applied Social Sciences Index and Abstracts (ASSIA) (1/5/2018) (373)*                                                                                                                                                                                                                                                                      |                                                                  |                                                                                                                                                                                                                 |
| ab(Prison* or imprison* or sentence* or remand* or jail* or correctional or criminal justice) (21,955)                                                                                                                                                                                                                                     | ab(prevalence OR incidence) OR su.Exact("epidemiology") (44,092) | Exact("drug abuse" OR "alcohol related disorders" OR "substance abuse" OR "mental disorders") OR ab(psychiatr* or psycho* or depress* or bipolar or schizophren* or alcohol* or substance or addict*) (176,787) |
| CAB Abstracts 1973 to 2018 Week 16 (1/5/2018) (112)*                                                                                                                                                                                                                                                                                       |                                                                  |                                                                                                                                                                                                                 |
| (Prison* or imprison* or sentence* or remand* or jail* or correctional or criminal justice).mp (2,164)                                                                                                                                                                                                                                     | epidemiology/ or (prevalence or incidence).mp. (447,300)         | mental disorders/ or substance abuse/ or (psychiatr* or psycho* or depress* or bipolar or schizophren* or alcohol* or substance or addict*).mp. (285,944)                                                       |
| China Academic Journals Full-text Database in China National Knowledge Infrastructure (CNKI) (24/7/2018) <sup>†</sup>                                                                                                                                                                                                                      |                                                                  |                                                                                                                                                                                                                 |
| prison AND mental; prison AND psychiatric; prison AND depression; prison AND psychosis; prison AND substance; prison AND abuse; prison AND dependence; prison AND addiction<br>jail AND mental; jail AND psychiatric; jail AND depression; jail AND psychosis; jail AND substance; jail AND abuse; jail AND dependence; jail AND addiction |                                                                  |                                                                                                                                                                                                                 |
| Criminal Justice Database (1/5/2018) (342)*                                                                                                                                                                                                                                                                                                |                                                                  |                                                                                                                                                                                                                 |
| all(Prison* OR imprison* OR sentence* OR remand* OR jail* OR correctional OR “criminal justice”) (51,735)                                                                                                                                                                                                                                  | Exact("epidemiology") OR ab(prevalence or incidence) (10,989)    | Exact("substance-related disorders" OR "mental disorders") OR ab(psychiatr* or psycho* or depress* or bipolar or schizophren* or alcohol* or substance or addict*) (63,735)                                     |
| Embase 1980 to 2018 Week 18 (1/5/2018) (2,718)*                                                                                                                                                                                                                                                                                            |                                                                  |                                                                                                                                                                                                                 |
| (Prison* or imprison* or sentence* or remand* or jail* or correctional or criminal justice).mp. (58,898)                                                                                                                                                                                                                                   | epidemiology/ or (prevalence or incidence).mp. (1,909,979)       | mental disease/ or drug dependence/ or alcoholism/ or (psychiatr* or psycho* or depress* or bipolar or schizophren* or alcohol* or substance or addict*).mp. (2,863,150)                                        |
| Global Health 1973 to 2018 Week 16 (1/5/2018) (516)*                                                                                                                                                                                                                                                                                       |                                                                  |                                                                                                                                                                                                                 |
| (Prison* or imprison* or sentence* or remand* or jail* or correctional or criminal justice).mp (5,029)                                                                                                                                                                                                                                     | epidemiology/ or (prevalence or incidence).mp. (474,935)         | mental disorders/ or substance abuse/ or (psychiatr* or psycho* or depress* or bipolar or schizophren* or alcohol* or substance or addict*).mp. (222,205)                                                       |
| International Bibliography of the Social Sciences (IBSS) (1/5/2018) (116)*                                                                                                                                                                                                                                                                 |                                                                  |                                                                                                                                                                                                                 |
| ab(Prison* OR imprison* OR sentence* OR remand* OR jail* OR correctional OR “criminal justice”) (21,927)                                                                                                                                                                                                                                   | Exact("epidemiology") OR ab(prevalence OR incidence) (30,465)    | Exact("substance-related disorders" OR "mental disorders") OR ab(psychiatr* or psycho* or depress* or bipolar or schizophren* or alcohol* or substance or addict*) (66,384)                                     |
| Latin American and Caribbean Health Sciences Literature (LILACS) (1/5/2018) (120)*                                                                                                                                                                                                                                                         |                                                                  |                                                                                                                                                                                                                 |

|                                                                                                                                                         |                                                                                                                                                                    |                                                                                                                                                                                                                                                                       |
|---------------------------------------------------------------------------------------------------------------------------------------------------------|--------------------------------------------------------------------------------------------------------------------------------------------------------------------|-----------------------------------------------------------------------------------------------------------------------------------------------------------------------------------------------------------------------------------------------------------------------|
| (tw:(prison\$ OR imprison\$ OR sentence\$ OR remand\$ OR jail\$ OR correctional OR criminal justice) (1,484)                                            | (tw:(epidemiolog\$ OR prevalence OR incidence) (111,772)                                                                                                           | (tw:(mental or psychiatr\$ or psycho\$ or depress\$ or bipolar or schizophren\$ or alcohol\$ or substance or addict\$) (108,175)                                                                                                                                      |
| MEDLINE(R) Epub Ahead of Print, In-Process & Other Non-Indexed Citations, Ovid MEDLINE(R) Daily and Ovid MEDLINE(R) 1946 to Present (1/5/2018) (2,150)* |                                                                                                                                                                    |                                                                                                                                                                                                                                                                       |
| (Prison* or imprison* or sentence* or remand* or jail* or correctional or criminal justice).mp. (46,923)                                                | EPIDEMIOLOGY/ or (prevalence or incidence).mp. (1,272,070)                                                                                                         | Mental Disorders/ or Substance-Related Disorders/ or (psychiatr* or psycho* or depress* or bipolar or schizophren* or alcohol* or substance or addict*).mp. (1,272,070)                                                                                               |
| National Criminal Justice Reference Service (NCJRS) (1/5/2018) (40)*                                                                                    |                                                                                                                                                                    |                                                                                                                                                                                                                                                                       |
| ab(Prison* or imprison* or sentence* or remand* or jail* or correctional or "criminal justice") (63,463)                                                | ab(epidemiolog* OR prevalence OR incidence) (9,603)                                                                                                                | Exact("substance abuse (60399)" OR "mental disorders (04529)") AND ab(psychiatr* or psycho* or depress* or bipolar or schizophren* or alcohol* or substance or addict*) (1,183)                                                                                       |
| PAIS Index (1/5/2018) (27)*                                                                                                                             |                                                                                                                                                                    |                                                                                                                                                                                                                                                                       |
| ab(Prison* or imprison* or sentence* or remand* or jail* or correctional or "criminal justice") (8,867)                                                 | Exact("epidemiology") OR ab(prevalence OR incidence) (11,016)                                                                                                      | Exact("substance-related disorders" OR "mental disorders") OR ab(psychiatr* or psycho* or depress* or bipolar or schizophren* or alcohol* or substance or addict*) (13,484)                                                                                           |
| PsycINFO 1806 to April Week 4 2018 (1/5/2018) (1,811)*                                                                                                  |                                                                                                                                                                    |                                                                                                                                                                                                                                                                       |
| (Prison* or imprison* or sentence* or remand* or jail* or correctional or criminal justice).mp. (77,669)                                                | exp EPIDEMIOLOGY/ or (prevalence or incidence).mp. [mp=title, abstract, heading word, table of contents, key concepts, original title, tests & measures] (149,748) | exp Mental Disorders/ exp Addiction/ or exp Alcohol Abuse/ or exp Drug Abuse/ or exp Drug Addiction/ or exp Alcoholism/ or exp Drug Dependency/ or (psychiatr* or psycho* or depress* or bipolar or schizophren* or alcohol* or substance or addict*).mp. (1,807,188) |
| Scopus (1/5/2018) (4,125)*                                                                                                                              |                                                                                                                                                                    |                                                                                                                                                                                                                                                                       |
| TITLE-ABS-KEY ( prison* OR imprison* OR sentence* OR remand* OR jail* OR correctional OR "criminal justice" ) (157,693)                                 | TITLE-ABS-KEY ( epidemiolog* OR prevalence OR incidence ) (2,313,318)                                                                                              | TITLE-ABS-KEY (mental OR psychiatr* OR psycho* OR depress* OR bipolar OR schizophren* OR alcohol* OR substance OR addict*) (4,607,258)                                                                                                                                |
| Social Services Abstracts (1/5/2018) (33)*                                                                                                              |                                                                                                                                                                    |                                                                                                                                                                                                                                                                       |
| ab(Prison* OR imprison* OR sentence* OR remand* OR jail* OR correctional OR "criminal justice") (7,132)                                                 | Exact("epidemiology") OR ab(prevalence OR incidence) (15,613)                                                                                                      | Exact("substance-related disorders" OR "mental disorders") AND ab(psychiatr* or psycho* or depress* or bipolar or schizophren* or alcohol* or substance or addict*) (4,275)                                                                                           |
| <b>Grey literature</b>                                                                                                                                  |                                                                                                                                                                    |                                                                                                                                                                                                                                                                       |
| Open Grey (1/5/2018) (27)†                                                                                                                              |                                                                                                                                                                    |                                                                                                                                                                                                                                                                       |
| prison* OR imprison* OR sentence* OR remand* OR jail* OR correctional OR "criminal justice" (3,587)                                                     | epidemiolog* OR prevalence OR incidence (14,287)                                                                                                                   | mental OR substance OR psychiatr* OR psycholog* OR smok* OR alcohol* OR substance OR drug OR addict* OR inject* (74,044)                                                                                                                                              |
| ProQuest Dissertations & Theses Global (1/5/2018) (210)*                                                                                                |                                                                                                                                                                    |                                                                                                                                                                                                                                                                       |
| ab(Prison* OR imprison* OR sentence* OR remand* OR jail* OR correctional OR "criminal justice") (31,175)                                                | Exact("epidemiology") OR ab(prevalence OR incidence) (70,689)                                                                                                      | Exact("drug abuse" OR "alcohol use" OR "alcoholism" OR "drug addiction" OR "mental disorders") OR ab(psychiatr* or psycho* or depress* or bipolar or schizophren* or alcohol* or substance or addict*) (174,767)                                                      |
| Google Scholar (2/5/2018)†‡                                                                                                                             |                                                                                                                                                                    |                                                                                                                                                                                                                                                                       |
| prison* OR imprison* OR sentence* OR remand* OR jail* OR correctional OR "criminal justice"                                                             | prevalence OR incidence                                                                                                                                            | psychiatr* OR psycho* OR substance OR depressi* OR bipolar                                                                                                                                                                                                            |

\* Number after discarding duplicates.

† Hits were not exported in reference manager.

‡ Searches were separately run for each LMIC and about the first 20% of hits were screened.

### Supplementary Material 1: Critical Appraisal Tool\*

Reviewer: \_\_\_\_\_ Date: \_\_\_\_\_

Author: \_\_\_\_\_ Year: \_\_\_\_\_ Record No. \_\_\_\_\_

| No.                      | Item                                                                                                                                                                                                                                                                                                                | Rating        |
|--------------------------|---------------------------------------------------------------------------------------------------------------------------------------------------------------------------------------------------------------------------------------------------------------------------------------------------------------------|---------------|
| <b>External Validity</b> |                                                                                                                                                                                                                                                                                                                     |               |
| 1.                       | Was the study's target population a close representation of the national population in relation to relevant variables? †<br><u>1 point:</u> Samples from more than one institution, representative for a province or the whole country.<br><u>0 point:</u> Otherwise.                                               |               |
| 2.                       | Was the sample representative of the target population? *<br><u>1 point:</u> Stratified random, random, population or systematic sampling.<br><u>0 point:</u> Convenience sampling.                                                                                                                                 |               |
| 3.                       | Was the sample size adequate? *<br><u>1 point:</u> Sample size equal to or greater than 200 participants or a pre-calculated sample size reached.<br><u>0 point:</u> Otherwise.                                                                                                                                     |               |
| 4.                       | Was the data analysis conducted with sufficient coverage of the identified sample? *<br><u>1 point:</u> Participation rate was equal or higher than 75% or a non-response analysis yielded non-significant results.<br><u>0 point:</u> Otherwise.                                                                   |               |
| <b>Internal Validity</b> |                                                                                                                                                                                                                                                                                                                     |               |
| 5.                       | Were the study subjects and the setting described in detail? *<br><u>1 point:</u> Reporting of the descriptive statistics to describe the sample included gender AND at least three other socio-demographic or criminal characteristic.<br><u>0 point:</u> Otherwise.                                               |               |
| 6.                       | Was the same standardized interview used for data collection by all subjects? †<br><u>1 point:</u> Yes.<br><u>0 point:</u> Other mode of data collection were applied.                                                                                                                                              |               |
| 7.                       | Were objective, standard criteria used for the measurement of the condition? *<br><u>1 point:</u> Disorders were assessed according to the criteria of DSM or ICD<br><u>0 point:</u> Conditions were measured with standardized screening scale, which did not fulfil disorder criteria.                            |               |
| 8.                       | Was the condition measured reliably? *<br><u>1 point:</u> Psychiatrist(s)/psychologist(s) made the diagnoses.<br><u>0 point:</u> Trained interviewer(s) made the diagnoses.                                                                                                                                         |               |
| 9.                       | Was there appropriate statistical reporting? *<br><u>1 point:</u> Confidence intervals/standard deviations were calculated for prevalence rates.<br><u>0 point:</u> Only prevalence estimates were reported.                                                                                                        |               |
| 10.                      | Were subpopulations identified using objective criteria? *<br><u>1 point:</u> The study explored only female/only male prisoners OR the results were reported separately for male/female prisoners.<br><u>0 point:</u> The study explored both male and female prisoners, but results were not reported separately. |               |
|                          |                                                                                                                                                                                                                                                                                                                     | <b>Score:</b> |

\* taken or adapted from JBI Critical Appraisal Checklist for Studies Reporting Prevalence <sup>1</sup>

† taken or adapted from the Risk of Bias Tool <sup>2</sup>

**Supplementary Table 2: Quality appraisal of studies reporting severe mental disorders or substance use disorders in prison populations of low- and middle-income countries**

| Study                               | 1.  | 2.  | 3.  | 4.  | 5.  | 6.  | 7.  | 8.  | 9.  | 10. | Score |
|-------------------------------------|-----|-----|-----|-----|-----|-----|-----|-----|-----|-----|-------|
| Adesanya et al. <sup>3</sup>        | No  | Yes | Yes | Yes | Yes | Yes | Yes | No  | No  | No  | 6     |
| Andreoli et al. <sup>4</sup> M      | Yes | Yes | Yes | No  | Yes | Yes | Yes | No  | Yes | Yes | 8     |
| Andreoli et al. <sup>4</sup> F      | Yes | No  | Yes | Yes | 9     |
| Assadi et al. <sup>5</sup>          | No  | Yes | 9     |
| Ayrolimeethal et al. <sup>6</sup> M | No  | Yes | No  | Yes | 8     |
| Ayrolimeethal et al. <sup>6</sup> F | No  | Yes | No  | Yes | Yes | Yes | Yes | Yes | No  | Yes | 7     |
| Boşgelmez et al. <sup>7</sup> M     | No  | Yes | No  | Yes | Yes | Yes | Yes | Yes | No  | Yes | 7     |
| Boşgelmez et al. <sup>7</sup> F     | No  | Yes | No  | Yes | Yes | Yes | Yes | Yes | No  | Yes | 7     |
| Canazaro & Argimon <sup>8</sup>     | No  | Yes | No  | Yes | 8     |
| El-Gilany et al. <sup>9</sup>       | Yes | No  | No  | 8     |
| Goyal et al. <sup>10</sup>          | No  | Yes | No  | No  | 7     |
| Joshi et al. <sup>11</sup>          | No  | Yes | No  | No  | Yes | Yes | Yes | Yes | No  | Yes | 6     |
| Kaya et al. <sup>12</sup>           | No  | Yes | Yes | Yes | Yes | Yes | Yes | No  | No  | No  | 6     |
| Kumar & Daria <sup>13</sup>         | No  | Yes | No  | No  | 7     |
| Majekodunmi et al. <sup>14</sup>    | No  | Yes | No  | Yes | 8     |
| Math et al. <sup>15</sup>           | No  | Yes | Yes | No  | Yes | No  | Yes | No  | No  | No  | 4     |
| Mundt et al. <sup>16</sup> M        | Yes | No  | Yes | Yes | 9     |
| Mundt et al. <sup>16</sup> F        | Yes | Yes | No  | Yes | Yes | Yes | Yes | No  | Yes | Yes | 8     |
| Mundt et al. <sup>17</sup> M        | Yes | 10    |
| Mundt et al. <sup>17</sup> F        | Yes | Yes | No  | Yes | 9     |
| Naidoo & Mkize <sup>18</sup>        | No  | Yes | No  | No  | 7     |
| Nanéma et al. <sup>19</sup>         | No  | Yes | Yes | Yes | Yes | Yes | Yes | No  | No  | No  | 6     |
| Ndetei et al. <sup>20</sup>         | No  | Yes | No  | No  | Yes | Yes | Yes | Yes | No  | No  | 5     |
| Niriella et al. <sup>21</sup> M     | Yes | Yes | Yes | Yes | No  | Yes | Yes | No  | No  | Yes | 7     |
| Niriella et al. <sup>21</sup> F     | Yes | Yes | No  | Yes | No  | Yes | Yes | No  | No  | Yes | 6     |
| Pondé et al. <sup>22</sup>          | Yes | Yes | Yes | Yes | No  | Yes | Yes | No  | No  | Yes | 7     |
| Salifou et al. <sup>23</sup>        | No  | Yes | No  | Yes | Yes | Yes | Yes | Yes | No  | Yes | 7     |
| Silva et al. <sup>24</sup> M        | No  | Yes | Yes | Yes | Yes | Yes | Yes | No  | No  | Yes | 7     |
| Silva et al. <sup>24</sup> F        | No  | Yes | No  | Yes | Yes | Yes | Yes | No  | No  | Yes | 6     |
| Zamzam & Hatta <sup>25</sup>        | No  | Yes | No  | Yes | Yes | Yes | Yes | Yes | No  | Yes | 7     |

F=Female, M=Male

**Supplementary Table 3:** Meta-regression analysis of study characteristics relating to severe mental illnesses

|                                                   | One-year prevalence of psychotic disorders |        |        |                  | One-year prevalence of major depressive disorders |        |        |              |
|---------------------------------------------------|--------------------------------------------|--------|--------|------------------|---------------------------------------------------|--------|--------|--------------|
|                                                   | $\beta$                                    | 95% CI |        | p                | $\beta$                                           | 95% CI |        | p            |
|                                                   |                                            | lower  | upper  |                  |                                                   | lower  | upper  |              |
| <b>UNIVARIATE ANALYSIS</b>                        |                                            |        |        |                  |                                                   |        |        |              |
| Sampled from all prisoners vs at intake           | 0.186                                      | 0.117  | 0.255  | <b>&lt;0.001</b> | 0.199                                             | 0.066  | 0.333  | <b>0.005</b> |
| Sex (male vs female)                              | -0.007                                     | -0.100 | 0.084  | 0.862            | 0.047                                             | -0.081 | 0.175  | 0.459        |
| Age (cont.)                                       | -0.014                                     | -0.035 | 0.007  | 0.179            | -0.001                                            | -0.031 | 0.032  | 0.962        |
| Sample size (n<500 vs n≥500)                      | -0.076                                     | -0.125 | -0.027 | <b>0.004</b>     | -0.116                                            | -0.227 | -0.006 | <b>0.039</b> |
| Time spent in prison (<1 y vs ≥1 y)               | -0.146                                     | -0.205 | -0.087 | <b>&lt;0.001</b> | -0.091                                            | -0.226 | 0.044  | 0.172        |
| Year of data collection (cont.)                   | 0.002                                      | -0.008 | 0.011  | 0.716            | 0.008                                             | -0.007 | 0.022  | 0.305        |
| Interviewer (mental health professional vs other) | 0.043                                      | -0.006 | 0.093  | 0.083            | 0.107                                             | -0.005 | 0.219  | 0.061        |
| Diagnostic criteria (DSM vs ICD)                  | -0.052                                     | -0.129 | 0.024  | 0.165            | -0.054                                            | -0.189 | 0.081  | 0.413        |
| Non-response rate (cont.)                         | -0.0001                                    | -0.003 | 0.003  | 0.967            | -0.0005                                           | -0.006 | 0.005  | 0.835        |
| Quality of the sample (cont.)                     | 0.002                                      | -0.020 | 0.025  | 0.831            | 0.026                                             | -0.013 | 0.065  | 0.189        |
| WHO-regions                                       | F <sub>(5,16)</sub> = 0.55                 |        |        | 0.733            | F <sub>(5,20)</sub> = 0.40                        |        |        | 0.840        |
| <b>MULTIVARATE ANALYSIS</b>                       |                                            |        |        |                  |                                                   |        |        |              |
| Sampled from all prisoners vs at intake           | 0.138                                      | 0.019  | 0.257  | <b>0.026</b>     | 0.168                                             | 0.033  | 0.303  | <b>0.017</b> |
| Sample size (n<500 vs n≥500)                      | -0.015                                     | -0.104 | 0.074  | 0.720            | -0.078                                            | -0.182 | 0.026  | 0.134        |
| Time spent in prison (<1 y vs ≥1 y)               | -0.040                                     | -0.170 | 0.090  | 0.515            |                                                   |        |        |              |

Bold values are significant (p<0.05).

**Supplementary Table 4: Sensitivity analysis of severe mental illnesses among prisoner populations in low- and middle-income countries (without studies conducted at intake to prison)**

|                     | Prevalence Rate  |                 | Prevalence Ratio |                 |
|---------------------|------------------|-----------------|------------------|-----------------|
|                     | 12-month         | 6-month         | 12-month         | 6-month         |
| Psychotic illnesses | 6.2 (4.0-8.6)    | 4.5 (3.1-6.2)   | 10.7 (6.7-17.1)  | 13.4 (7.4-24.3) |
| male                | 6.6 (3.7-10.2)   | 4.9 (3.1-7.1)   | 11.1 (6.0-20.4)  | 14.4 (6.7-30.7) |
| female              | 5.7 (1.9-11.0)   | 2.7 (0.4-6.3)   | 8.3 (5.0-13.6)   | 11.8 (4.5-30.9) |
| Major Depression    | 16.0 (11.7-20.8) | 12.6 (7.9-18.0) | 5.3 (3.9-7.2)    | 5.2 (3.6-7.6)   |
| male                | 15.9 (11.1-21.4) | 13.3 (8.2-19.4) | 6.3 (4.4-9.1)    | 6.1 (4.0-9.5)   |
| female              | 19.4 (11.7-28.5) | 15.2 (5.1-29.0) | 5.3 (3.1-8.9)    | 6.7 (3.6-12.3)  |
| Schizophrenia       |                  |                 | 7.9 (4.9-12.7)   |                 |
| male                |                  |                 | 7.0 (4.1-11.9)   |                 |
| female              |                  |                 | 7.2 (3.9-13.2)   |                 |

**Supplementary Table 5: Meta-regression analysis of study characteristics relating to substance use disorders**

|                                                   | Current alcohol use disorders |                           |        |              | Current drug use disorders |                           |        |       | Lifetime drug use disorders |                           |       |              |
|---------------------------------------------------|-------------------------------|---------------------------|--------|--------------|----------------------------|---------------------------|--------|-------|-----------------------------|---------------------------|-------|--------------|
|                                                   | β                             | 95% CI                    |        | p            | β                          | 95% CI                    |        | p     | β                           | 95% CI                    |       | p            |
|                                                   |                               | lower                     | upper  |              |                            | lower                     | upper  |       |                             | lower                     | upper |              |
| Sex (male vs female)                              | -0.018                        | -0.127                    | 0.091  | 0.718        | -0.014                     | -0.096                    | 0.068  | 0.704 | 0.078                       | -0.227                    | 0.383 | 0.579        |
| Age (cont.)                                       | -0.009                        | -0.043                    | 0.026  | 0.581        | 0.015                      | -0.014                    | 0.045  | 0.265 | 0.009                       | -0.027                    | 0.046 | 0.572        |
| Sample size (n<500 vs n≥500)                      | 0.036                         | -0.050                    | 0.122  | 0.369        | -0.037                     | -0.104                    | 0.030  | 0.242 | -0.238                      | -0.479                    | 0.003 | 0.052        |
| Time spent in prison (<1 y vs ≥1 y)               | -0.0002                       | -0.189                    | 0.189  | 0.998        | 0.020                      | -0.367                    | 0.326  | 0.891 | -0.108                      | -0.951                    | 0.735 | 0.740        |
| Year of data collection (cont.)                   | 0.006                         | -0.008                    | 0.021  | 0.343        | -0.001                     | -0.008                    | -0.007 | 0.807 | -0.008                      | -0.052                    | 0.035 | 0.654        |
| Interviewer (mental health professional vs other) | -0.031                        | -0.139                    | 0.077  | 0.539        | 0.056                      | -0.049                    | 0.162  | 0.254 | 0.181                       | -0.095                    | 0.457 | 0.172        |
| Diagnostic criteria (DSM vs ICD)                  | 0.033                         | -0.056                    | 0.122  | 0.422        | -0.051                     | -0.120                    | 0.017  | 0.122 | -0.154                      | -0.450                    | 0.141 | 0.263        |
| Non-response rate (cont.)                         | -0.001                        | -0.003                    | 0.002  | 0.531        | -0.002                     | -0.005                    | 0.001  | 0.214 | -0.004                      | -0.021                    | 0.014 | 0.623        |
| Quality of the study (cont.)                      | -0.024                        | -0.035                    | -0.013 | <b>0.001</b> | 0.002                      | -0.027                    | 0.032  | 0.875 | 0.081                       | -0.005                    | 0.166 | 0.062        |
| WHO-regions*                                      |                               | F <sub>(4,7)</sub> = 7.47 |        | <b>0.011</b> |                            | F <sub>(4,6)</sub> = 0.51 |        | 0.733 |                             | F <sub>(4,6)</sub> = 3.75 |       | 0.073        |
| Africa                                            | 0.036                         | -0.120                    | 0.191  | 0.604        |                            |                           |        |       | -                           |                           |       |              |
| Americas                                          | 0.030                         | -0.102                    | 0.163  | 0.607        |                            |                           |        |       | 0.171                       | -0.208                    | 0.551 | 0.311        |
| Eastern Mediterranean                             | Ref.                          |                           |        |              |                            |                           |        |       | 0.627                       | 0.146                     | 1.108 | <b>0.019</b> |
| Europe                                            | -                             |                           |        |              |                            |                           |        |       | Ref.                        |                           |       |              |
| South-East Asia                                   | 0.140                         | 0.010                     | 0.271  | <b>0.038</b> |                            |                           |        |       | 0.091                       | -0.292                    | 0.475 | 0.581        |
| Western Pacific                                   | 0.025                         | -0.267                    | 0.317  | 0.845        |                            |                           |        |       | 0.371                       | -0.165                    | 0.909 | 0.141        |

Bold values are significant (p<0.05).

\*Region with the lowest pooled prevalence estimate is taken as reference category.



**Supplementary Figure 1: Funnel Plots estimating small sample bias in studies reporting severe mental illnesses and substance use disorders in prison populations in low- and middle-income countries**

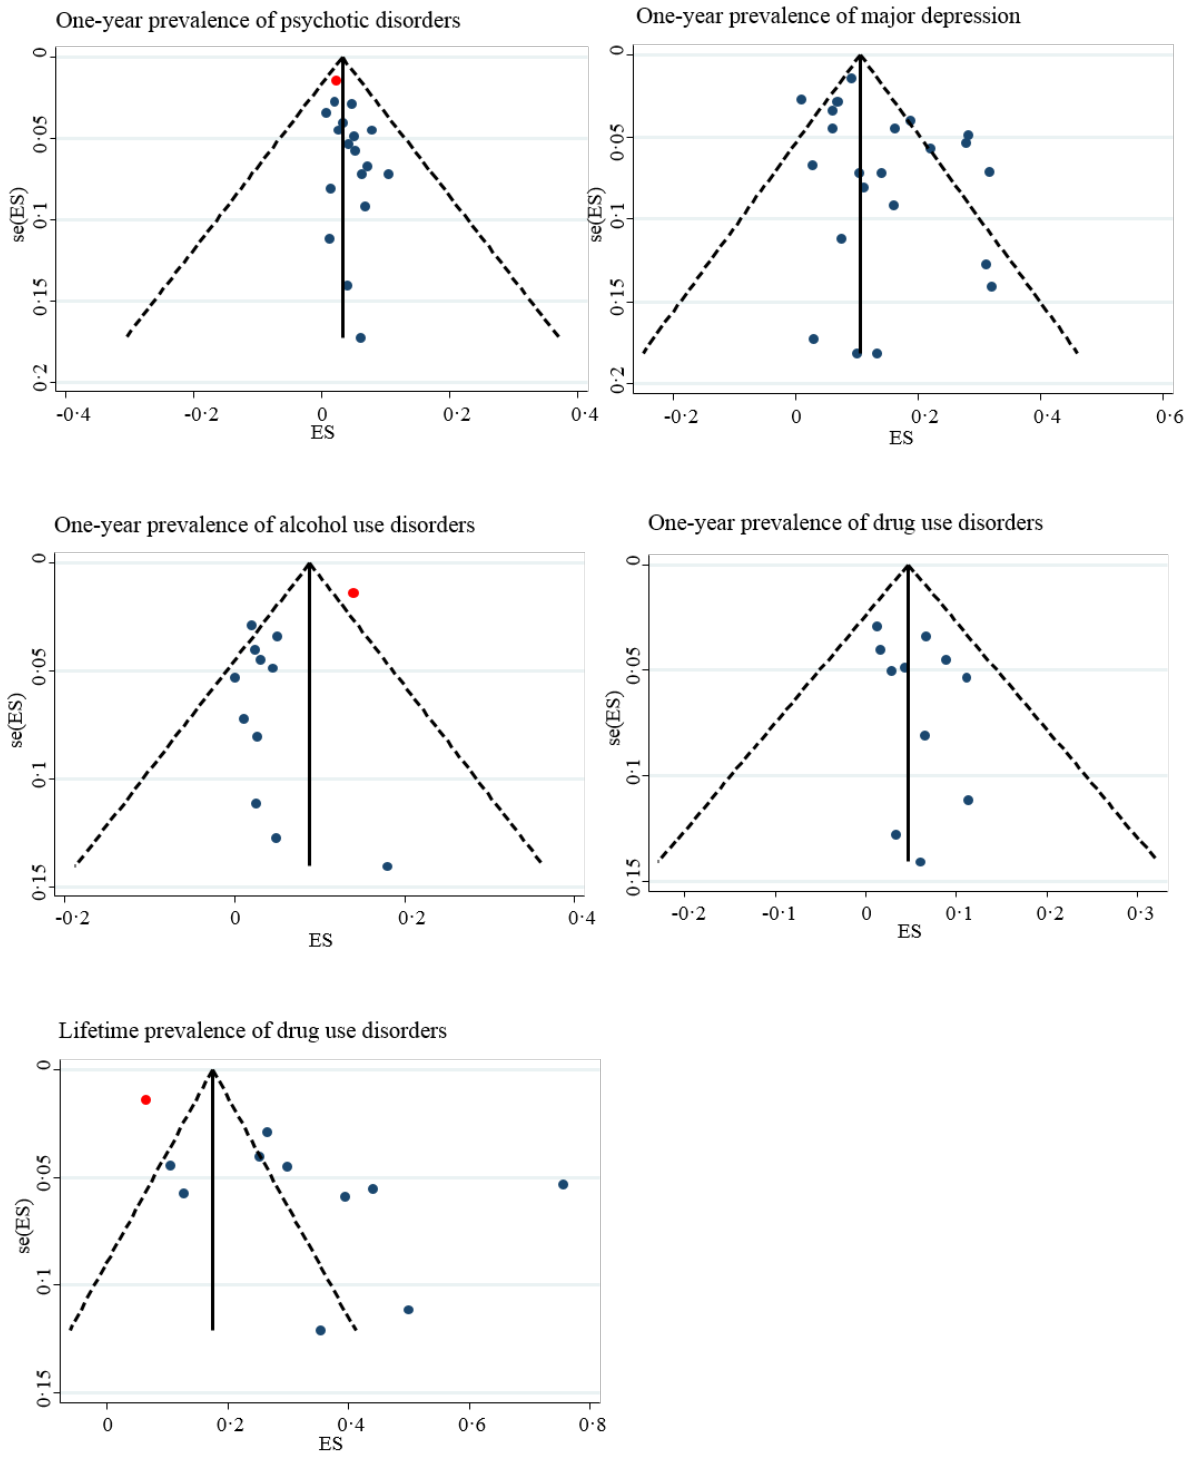

Estimates are plotted against the standard error of the estimate; red point symbolize estimates excluded for sensitivity analysis.

## References

1. Munn Z, Moola S, Riitano D, Lisy K. The development of a critical appraisal tool for use in systematic reviews addressing questions of prevalence. *Int J Health Policy Manag* 2014; **3**: 123–8.
2. Hoy D, Brooks P, Woolf A, et al. Assessing risk of bias in prevalence studies: modification of an existing tool and evidence of interrater agreement. *J Clin Epidemiol* 2012; **65**: 934–9.
3. Adesanya A, Ohaeri JU, Ogunlesi AO, Adamson TA, Odejide OA. Psychoactive substance abuse among inmates of a Nigerian prison population. *Drug Alcohol Depend* 1997; **47**: 39–44.
4. Andreoli SB, Dos Santos MM, Quintana MI, et al. Prevalence of mental disorders among prisoners in the state of Sao Paulo, Brazil. *PLoS ONE* 2014; **9**: e88836.
5. Assadi SM, Noroozian M, Pakravannejad M, et al. Psychiatric morbidity among sentenced prisoners: Prevalence study in Iran. *Br J Psychiatry* 2006; **188**: 159–64.
6. Ayirolimeethal A, Ragesh G, Ramanujam JM, George B. Psychiatric morbidity among prisoners. *Indian J Psychiatry* 2014; **56**: 150–3.
7. Boşgelmez S, Aker T, Oznur AK, Ford JD. Assessment of lifetime history of exposure to traumatic stressors by incarcerated adults with the turkish version of the traumatic events screening instrument for adults (TESI-A): A pilot study. *J Trauma Dissociation* 2010; **11**: 407–23.
8. Canazaro D, de Lima Argimon II. Characteristics, depressive symptoms, and associated factors in incarcerated women in the State of Rio Grande do Sul, Brazil [in Portuguese]. *Cad Saude Publica* 2010; **26**: 1323–33.
9. El-Gilany A, Khater M, Gomaa Z, Hussein E, Hamdy I. Psychiatric Disorders among Prisoners: A National Study in Egypt. *East Asian Arch Psychiatry* 2016; **26**: 30–8.
10. Goyal SK, Singh P, Gargi PD, Goyal S, Garg A. Psychiatric morbidity in prisoners. *Indian J Psychiatry* 2011; **53**: 253–7.
11. Joshi P, Kukreja S, Desousa A, Shah N, Shrivastava A. Psychopathology and other contributing stressful factors in female offenders: An exploratory study. *Indian Journal of Forensic Medicine and Toxicology* 2014; **8**: 149–55.
12. Kaya N, Guler O, Cilli AS. Prevalence of psychiatric disorders among prisoners in Konya prison [in Turkish]. *Anadolu Psikiyatri Dergisi* 2004; **5**: 85–91.
13. Kumar V, Daria U. Psychiatric morbidity in prisoners. *Indian J Psychiatry* 2013; **55**: 366–70.
14. Majekodunmi O, Obadeji A, Oluwole L, Oyelami R. Depression in prison population: Demographic and clinical predictors. *J Forensic Sci Med* 2017; **3**: 122–7.
15. Math SB, Murthy P, Parthasarathy R, Kumar CD, Madhusudhan S. Mental Health and Substance Use Problems in Prisons. The Bangalore Prison Mental Health Study: Local Lessons for National Action. Bangalore, India: National Institute of Mental Health and Neuro Sciences; 2011.
16. Mundt AP, Alvarado R, Fritsch R, et al. Prevalence Rates of Mental Disorders in Chilean Prisons. *PLoS ONE* 2013; **8**: e69109.
17. Mundt AP, Kastner S, Larraín S, Fritsch R, Priebe S. Prevalence of mental disorders at admission to the penal justice system in emerging countries: A study from Chile. *Epidemiol Psychiatr Sci* 2016; **25**: 441–9.
18. Naidoo S, Mkize DL. Prevalence of mental disorders in a prison population in Durban, South Africa. *Afr J Psychiatry* 2012; **15**: 30–5.
19. Nanéma D, Gombri P, Karfo K, Ouango JG, Ouédraogo A. Epidemiological and clinical aspects of mental disorders in prisons in Ouagadougou, Burkina Faso [in French]. *Annales Africaines de Psychiatrie* 2014; **3**: 59–75.
20. Ndeti D, Khasakhala L, Mutiso V, Harder V. Mental disorders and HIV risk behaviors among prisoners in South Sudan. Nairobi, Kenya: United Nations Office On Drugs And Crime (UNODC), 2008.
21. Niriella MA, Hapangama A, Luke HP, Pathmeswaran A, Kurupparachchi KA, de Silva HJ. Prevalence of hepatitis B and hepatitis C infections and their relationship to injectable drug use in a cohort of Sri Lankan prison inmates. *Ceylon Med J* 2015; **60**: 18–20.
22. Pondé MP, Freire AC, Mendonca MS. The prevalence of mental disorders in prisoners in the city of Salvador, Bahia, Brazil. *J Forensic Sci* 2011; **56**: 679–82.
23. Salifou S, Wenkourama D, Soedje KMA, Anagonou L, Agouda B, Dassa KS. Mental health of women detained in the civil prison of Lome [in French]. *Health Sci Dis* 2018; **19**: 46–50.
24. Silva NC, Rosa MI, Amboni G, Mina F, Comim CM, Quevedo J. Psychiatric disorders and risk factors in a prison population [in Portuguese]. *ACM arq catarin med* 2011; **40**: 72–6.
25. Zamzam R, Hatta SM. Specific Psychiatric Disorders Among Convicted Female Offenders in a Malaysian Prison. *Malaysian Journal of Psychiatry* 2000; **8**: 34–42.
